# Supplementary material
Source: PubMed Central journal article supplement (PMC3414659)
Supplement: NIHMS370594-supplement-01.pdf [file NIHMS370594-supplement-01.pdf]

S1.

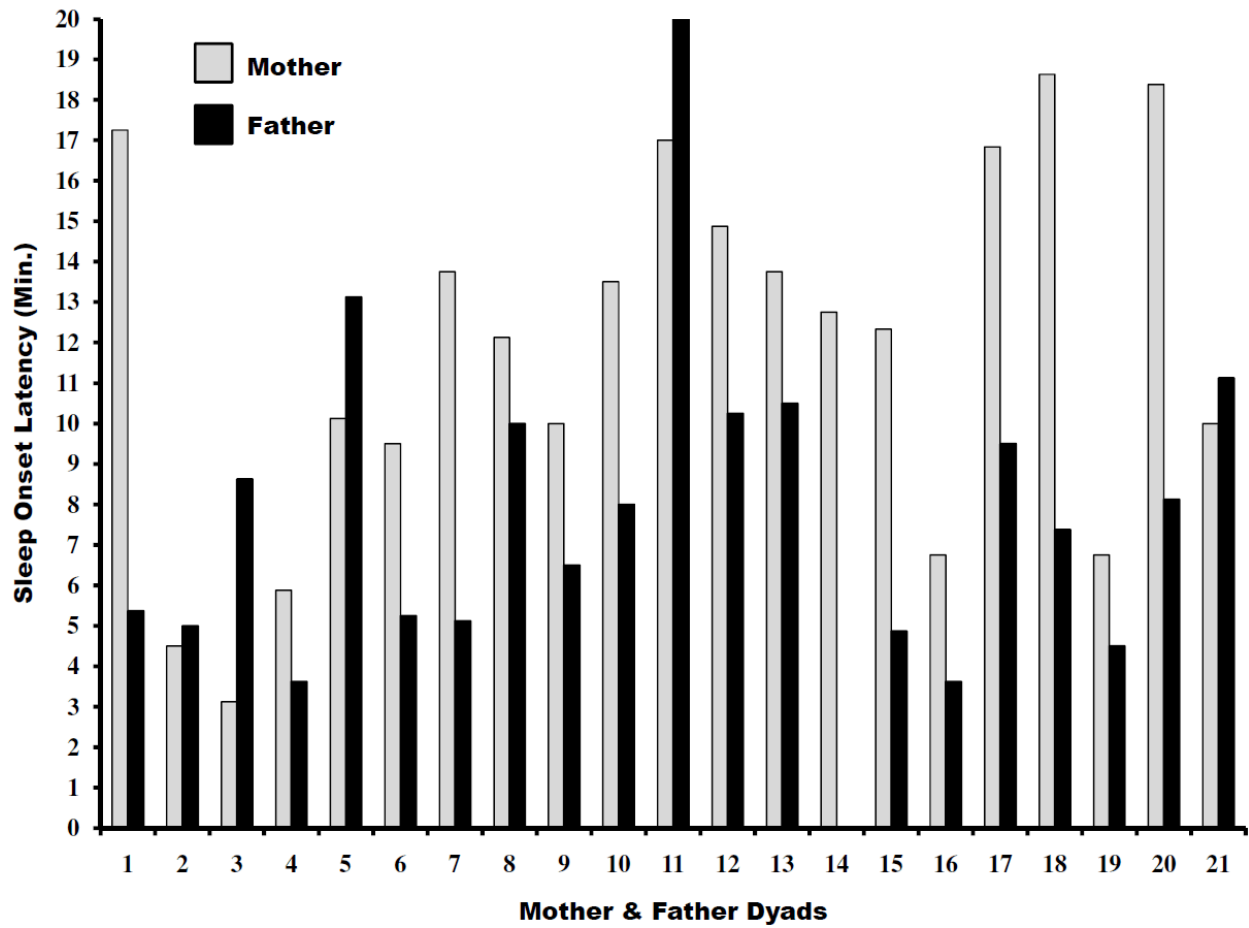

**Note.** Father from dyad #14 is missing his MSLT value as indicated in the Preliminary Analyses section.
